# Supplementary material for: Same-Day Discharge Versus Extended-Stay Robotic Metabolic Bariatric Surgery Including Duodenal Switch and Conversions, Prospective 10-year Safety Study
Source: Research Square preprint supplement (doi:10.21203/rs.3.rs-8526516/v1), 2026-02-10
Supplement: Supplementary file 1 [file 299071868f65d2de321b9b2f.docx]

**Supplemental Table 5**

**Supplemental Table 5. ED Visits and IV Hydration Visits**

| **All-Occurrence Morbidity** | **Same-Day Discharge**  **(n=568)** | **Extended Stay**  **(n=329)** | **p-value** |
| --- | --- | --- | --- |
| ED visit | 53/568 (9.3) | 22/329 (6.7) | 0.2104 |
| IV hydration visit | 2/568 (0.4) | 1/329 (0.3) | >0.999* |

ED, emergency department; IV, intravenous. * too few events
