# Supplementary material for: Same-Day Discharge Versus Extended-Stay Robotic Metabolic Bariatric Surgery Including Duodenal Switch and Conversions, Prospective 10-year Safety Study
Source: Research Square preprint supplement (doi:10.21203/rs.3.rs-8526516/v1), 2026-02-10
Supplement: Supplementary file 2 [file 5106726b5ea8dffa0d7a3d7e.docx]

**Supplemental Figure 3**

**Supplemental Figure 3. 30-Day All-Occurrence Morbidity Within Each Surgery Type by Length of Stay (Same-Day Discharge vs Extended-Stay)***


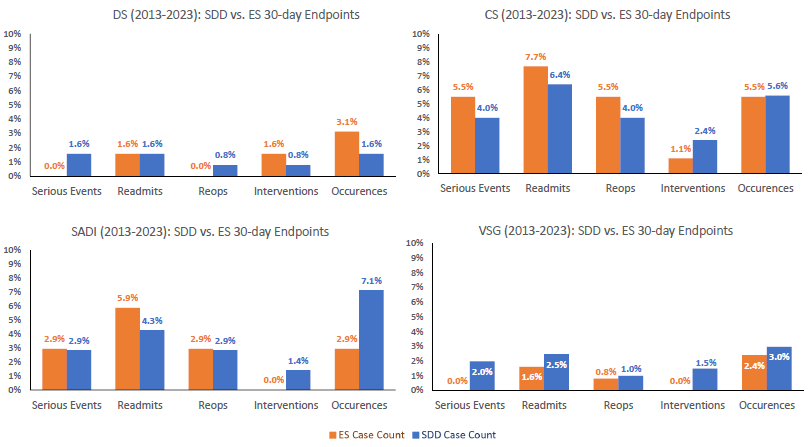


* PGBP and Others not shown due to small sample size.
