# Supplementary material for: Same-Day Discharge Versus Extended-Stay Robotic Metabolic Bariatric Surgery Including Duodenal Switch and Conversions, Prospective 10-year Safety Study
Source: Research Square preprint supplement (doi:10.21203/rs.3.rs-8526516/v1), 2026-02-10
Supplement: Supplementary file 3 [file 53ff1cb533b8bc8701ef6d15.docx]

**Supplemental Table 6**

**Supplemental Table 6. Summary Statistics of Additional Potential Predictors of All-Occurrence Morbidity**

| **All-Occurrence Morbidity** | **N=897**  **n (% of N)** | **Same-Day Discharge (n=568)** | | **Extended Stay (n=329)** | | **p-value** |
| --- | --- | --- | --- | --- | --- | --- |
| **% of SDD** | **% with events** | **% of ES** | **% with events** |  |
| ***By comorbidity or other factors*** |  |  |  |  |  |  |
| BMI 50  High BMI based on sex*  Surgery performed 2020 or prior | 130 (14.5)  33 (3.7)  677 (75.5) | 70/568 (12.3)  18/568 (3.2)  358/568 (63.0) | 5/70 (7.1)  0/18 (0)  24/358 (6.7) | 60/329 (18.2)  15/329 (4.6)  319/329 (97.0) | 4/60 (6.7)  1/15 (6.7)  19/319 (6) | >0.999  >0.999  0.7534 |
| Surgery performed 2021 or later | 220 (24.5) | 210/568 (37.0) | 7/210 (3.3) | 10/329 (3) | 1/10 (10) | 0.3150 |

BMI, body mass index; ES, extended stay; MBSAQIP, Metabolic and Bariatric Surgery Accreditation and Quality Improvement Program; SDD, same-day discharge.

*High BMI based on sex (ie, F >60, M >55) is defined as the MBSAQIP BMI cut-off for patients being able to have their surgery at a free-standing Ambulatory Surgery Center or low acuity center vs a comprehensive center.
