# Supplementary material for: Same-Day Discharge Versus Extended-Stay Robotic Metabolic Bariatric Surgery Including Duodenal Switch and Conversions, Prospective 10-year Safety Study
Source: Research Square preprint supplement (doi:10.21203/rs.3.rs-8526516/v1), 2026-02-10
Supplement: Supplementary file 4 [file 72e9253b4b6b6d071d0b2c10.docx]

**Supplemental Table 7**

**Supplemental Table 7. All-Occurrence Morbidity Associated With Number of Hypertension Medications Among All Patients and Among Patients With Hypertension**

| **Number of hypertension medications** | **All Patients**  **(N=897)** | **Patients With Hypertension**  **(n=329)** |
| --- | --- | --- |
| 0 | 32/662 (4.8) | 3/94 (3.2) |
| 1 | 6/124 (4.8) | 6/124 (4.8) |
| 2 | 7/73 (9.6) | 7/73 (9.6) |
| 3 | 5/29 (17.2) | 5/29 (17.2) |
| 4 | 1/9 (11.1) | 1/9 (11.1) |

Cochran-Armitage Trend Test 2-sided p-value: p=0.0066.
