# Supplementary material for: Same-Day Discharge Versus Extended-Stay Robotic Metabolic Bariatric Surgery Including Duodenal Switch and Conversions, Prospective 10-year Safety Study
Source: Research Square preprint supplement (doi:10.21203/rs.3.rs-8526516/v1), 2026-02-10
Supplement: Supplementary file 5 [file 95d4c6123711cb1d059b179d.docx]

**Supplemental Digital Content 1**

**Definitions used in the manuscript**

All-occurrence morbidity: A case was included as an all-occurrence morbidity when at least one of the following events occurred within 30 days of the index procedure: (1) serious event, (2) reoperation, (3) readmission, (4) intervention, and (5) postoperative occurrence. These 5 morbidities are defined by the Metabolic and Bariatric Surgery Accreditation and Quality Improvement Program (MBSAQIP).

Serious Event: (including death, unplanned related reoperation, admission to intensive care unit, transfusion, intubation, on a ventilator >48 hours, progressive renal insufficiency, renal failure, cerebrovascular accident, cardiac arrest, myocardial infarction, pulmonary embolism, postoperative venous thrombosis requiring therapy, urinary tract infection, postoperative sepsis, septic shock, anastomotic/staple line leak, gastrointestinal tract bleed, bowel obstruction);

Morbidity: superficial incisional SSI; deep incisional SSI; organ/space SSI; wound disruption; pneumonia; unplanned intubation; pulmonary embolism; on ventilator >48 h; progressive renal insufficiency; acute renal failure; urinary tract infection; stroke/cerebral vascular accident; cardiac arrest requiring CPR; myocardial infarction; transfusion (within 72 h of surgery start time); postoperative venous thrombosis requiring therapy; *Clostridioides difficile*; postoperative sepsis; postoperative septic shock; anastomotic/staple line leak; gastrointestinal tract bleeding; bowel obstruction.

SSI: An infection that occurs at the surgical site/sites integral to the primary procedure within 30 days after the primary procedure and involves superficial/deep/organ space (site/level) and at least ONE of the following:

1. Purulent drainage or a positive culture from the superficial/deep/organ space (site/level) but not from the organ/space component of the surgical site.
2. A superficial/deep/organ space (site/level) spontaneously dehisces or is deliberately opened by a physician or advanced practitioner when the patient has at least one of the following signs or symptoms: fever (greater than 38°C), localized pain, or tenderness unless the site is culture negative.
3. An abscess or other evidence of infection involving the superficial/deep/organ space (site/level) is found on direct examination, during reoperation, or by radiological examination.
4. Diagnosis of superficial/deep/organ space (site/level) SSI by a physician or advanced practitioner.

*Superficial Incisional SSI*: An infection that involves only the skin or subcutaneous tissue of the surgical incision.

*Deep Incisional SSI*: An infection that involves deep soft tissues, which are typically any tissue beneath the skin and immediate subcutaneous fat (e.g., fascial and muscle layers).

*Organ/Space SSI*: An infection that involves any part of the anatomy (e.g., organs or spaces) other than the incision, which was opened or manipulated during the primary procedure.

Only one SSI occurrence was assigned during the 30-day postoperative timeframe. If multiple incision sites or layers of the same surgical incision (of the primary procedure or an integral procedure) meet the SSI criteria, assign the only SSI occurrence during the 30-day postoperative timeframe at the deepest level (superficial incisional, deep incisional, or organ/space). When a diagnosis of an infection was made and/or antimicrobial treatment was initiated based on any diagnostic test, that test was used to assign the occurrence. Examples include but are not limited to point-of-care testing (e.g., Gram stain, rapid strep, whiff test) or a culture collected from a drain, but only in conjunction with a diagnosis of infection being made and recorded, or treatment being initiated. If a diagnosis of an inflammatory condition (e.g., itis”, peritonitis, etc.) is treated with oral/intravenous (IV)/intramuscular (IM) antimicrobials, this is considered a diagnosis of an infection (i.e., meets criterion D). However, a gastrointestinal intraluminal infection (gastritis, enteritis, or colitis) does not meet the criteria for assigning an organ/space SSI, regardless of treatment. In addition, *C. diff* colitis infections were captured under the “*C. diff* colitis” variable.

Wound disruption: A spontaneous reopening of a surgically closed wound that occurred within 30 days after the primary procedure and loss of the integrity of fascial closure (or whatever closure was performed in the absence of fascial closure). The following are NOT examples of wound disruption: an ostomy with a small separation around it, anastomotic leaks, a surgical wound that was intentionally reopened by an advanced provider, and flap closure when the flap fails due to poor perfusion rather than when the closure spontaneously dehisces.

Renal insufficiency:

1. *Progressive renal insufficiency:* A rise in creatinine level of >2 mg/dL from the preoperative value but with no requirement for preoperative (within the 2-week timeframe prior to surgery) or postoperative dialysis.
2. *Acute renal failure requiring dialysis:* A patient who did not require dialysis preoperatively (within the 2-week timeframe prior to surgery) and worsening of renal dysfunction postoperatively requiring dialysis.

Stroke/cerebrovascular accident: Motor, sensory, or cognitive dysfunction that persists for 24 h or more in the setting of a suspected stroke. This also includes a diagnosis of stroke in the absence of documentation of a specific timeframe for dysfunction in the medical record, unless documentation specifically states that the motor, sensory, or cognitive dysfunction resolved within 24 hours.

Postoperative venous thrombosis requiring therapy: Postoperative diagnosis of a new venous thrombosis (superficial or deep), confirmed by a duplex, venogram, computed tomography (CT) scan, or any other definitive imaging modality (including direct pathology examination such as autopsy), and the patient must have been treated. The treatment criterion was also met if the record indicated that treatment was warranted but (1) no additional appropriate treatment option was available, or (2) the patient or decision maker refused treatment, which was documented in the medical record. Examples include internal jugular clots, cephalic vein clots, portal vein clots, patient refusal of required therapy, preoperative presentation of chronic venous thrombosis that was also noted postoperatively with evidence of new progression, and documentation of a new thrombus, but the medical professional documented that a current anticoagulant the patient was taking was sufficient to treat the new thrombus.

Postoperative sepsis: A documented infectious process noted within the specified timeframe was accompanied by at least one sign of hypoperfusion or organ dysfunction that was new and not explained by another known etiology of organ dysfunction noted within 30 days following the primary procedure. BOTH Criteria A and B must have been met within the outlined infection window:

*Infection window:* the 7 days during which all criteria must be met. The date on which the infection criteria (Criterion A) were met establishes the window. The window then extends three calendar days before and three calendar days after the date Criterion A was met. Organ dysfunction (Criterion B) had to occur within the 7-day infection window. If part of the infection window extended beyond the 30-day postoperative period, criteria occurring outside the 30-day postoperative period were not utilized to assign this occurrence.

1. Definitive diagnosis of sepsis/septic shock by an advanced provider or physician OR evidence of infection: positive blood culture; a positive result of bacteria, fungus, or virus from any appropriately obtained culture or non-culture-based microbiologic test (e.g., PCR/nucleic acid or antigen testing); procalcitonin level >2ng/mL; purulence from any site; definitive diagnosis of acute infection by an advanced provider or physician (e.g., pneumonia, UTI, pneumatosis, necrotizing fasciitis, or other necrotizing soft tissue infections); confirmed intraoperative findings of ischemic/infarcted bowel or other organs requiring resection; or findings of necrotic or perforated bowel or other viscus (e.g., gangrenous gallbladder, perforated appendix); extravasation of enteric contents; negative/inconclusive blood culture AND new antimicrobial therapy started within the infection window and continued for a minimum of 4 days within the 30-day postoperative timeframe.
2. Organ dysfunction: One or more of the following noted within the 30-day postoperative timeframe present during the infection window: sustained hypotension (2 hypotensive blood pressure readings obtained greater than 30 min apart with no normotensive readings in between). Hypotension was defined as systolic blood pressure (SBP) <90 mmHg or mean arterial pressure (MAP) <65 mmHg (MAP = [SBP + (2 · diastolic blood pressure [DBP] ÷ 3) (note: hypotensive readings due to hypovolemia, blood loss, or hemodynamic changes due to operative management during the procedure were excluded); creatinine >2 mg/dL; urine output <400 mL/day; total bilirubin >2 mg/dL and 100% increase from baseline OR if no baseline was identified, total bilirubin >4 mg/dL, platelets <100,000, coagulopathy defined by International Normalized Ratio >1.5 OR aPTT >60 sec, lactate >2 mmol/L, acute respiratory failure as evidenced by new or increased need for invasive (e.g., endotracheal tube [ETT], trach) or non-invasive (e.g., CPAP, BIPAP) mechanical ventilation, Glasgow Coma Scale <11.

Postoperative septic shock: Definitive diagnosis of sepsis/septic shock by an advanced provider or physician or evidence of infection and organ dysfunction: met at least one of the following within the infection window occurring within the 30-day postoperative timeframe: lactate level >4 mmol/L, new or increased vasopressor continuous infusion to maintain blood pressure within the normal range that was specifically not explainable by hypovolemia, blood loss, operative management of hemodynamics during a procedure, defined by either dopamine >5 µg/kg/min or any dose of dobutamine, epinephrine, norepinephrine, phenylephrine, or vasopressin.

Anastomotic/staple line leak: A leak of endoluminal contents through an anastomosis or staple line from metabolic and bariatric procedures. This could include air, fluid, gastrointestinal contents, contrast material, or the presence of an infection/abscess that is thought to be related to anastomosis. An organ/space SSI was assigned AND due to a leak of endoluminal contents through an anastomosis or staple line from the metabolic and bariatric procedure and was either a reoperation due to a leak or an intervention due to a leak. Examples include drainage of the leak (e.g., interventional radiology drainage), placement of a drain due to a leak, placement of a stent due to a leak, and leak noted on reoperation. The following are NOT examples of anastomotic/staple line leaks: a leak definitively ruled out during a reoperation, patient treatment with antibiotics only, leak or possible leak noted on radiologic study but not confirmed via reoperation or intervention.

Gastrointestinal tract bleed: bleeding from any portion of the gastrointestinal tract. This could have been at a staple line, anastomosis, enterotomy, or ulcer, and one of the following: readmission, reoperation, intervention, any blood transfusion (packed red blood cells only; NOT fresh frozen plasma), platelets, or volume expanders (e.g., crystalloids or colloids), critical drop in blood pressure, and/or increase in heart rate, resulting in a transfer to a higher level of care or the administration of pressors. Examples included bleeding from the omentum and hematoma found during reoperation.

Bowel obstruction: partial or complete blockage of the gastrointestinal tract following metabolic and bariatric surgery. Bowel obstruction could have been related to ileus, internal hernias, adhesions, or strictures, and one of the following: readmission, reoperation, intervention, initial hospital stay ≥4 days primarily due to delayed bowel function, placement of a nasogastric tube, prolonged bowel rest, and/or reinstating nil per os (nothing by mouth [NPO]) status on or after the postoperative day (POD 4).

30-day event: An event that presents within 30 days (prior to midnight of POD 30 of the primary procedure) following the primary procedure and meets any of the corresponding variable criteria. Each day of this 30-day postoperative period is commonly referred to as POD. The 30-day postoperative period begins when the patient’s surgery ends (POD 0), the next day is POD 1, etc. The postoperative period begins on POD 0 after the patient was transported out of the operating room (patient out-of-room time) following the primary procedure.

Unplanned: qualifier meant to reflect that there was no prior documentation in any available records, before or during the primary procedure (operative report), that this reoperation/readmission/intervention was part of a plan of care for the patient.

Outpatient IV hydration visit: Outpatient visit within the 30-day postoperative timeframe during which IV fluids or IV medication was administered for nausea and vomiting or fluid, electrolyte, or nutritional depletion.

Emergency department (ED) visit: ED visits during which criteria were not met for readmission. Visits to urgent care centers that functioned as EDs were also counted. This included visits in which a patient was evaluated by an emergency provider (i.e., MD, DO, PA, and NP), but eloped or left against medical advice.

Re-Smoking - We adhered to the MBSAQIP standard: If it is reported in either EMR within 12 months of surgery (office notes or anesthesia or pre-op clinic RN) per standard: A person who has used tobacco/nicotine products at any point within the 12 months prior to admission for surgery. This included all forms of tobacco and nicotine use, such as smoking, chewing, vaping, and other methods of consumption. This did not include the use of marijuana or tobacco/nicotine-free mechanical/electronic cigarettes

**Methods**

*Preoperative process*

Preoperative evaluation was initiated by consultation with the surgeon, followed by additional visits for nutritional assessment, activity, lifestyle modification, blood sugar control, weight loss to ensure patient optimization, psychological assessment, and other payor-specific pre-surgery processes. Standard laboratories, electrocardiography, focused assessment of the upper gastrointestinal (UGI) tract (including endoscopy and fluoroscopic evaluation in patients undergoing revisions), abdominal ultrasound, chest radiography, and bone densitometry were performed. The evaluation included a risk assessment for noncardiac surgery by the team and consultants.

All smokers were counseled about the higher complication rates in smokers and encouraged to quit smoking at least 4 weeks prior. Most did, however, some chose not to and decided to proceed understanding this risk (or needed the revision/ conversion to address complications). The number of smokers that quit smoking prior to the MBS surgery was not separately tracked.

A final pre-surgery assessment with the surgeon ~1-4wks prior to surgery was conducted to review these findings and obtain informed consent, set patient expectations, and assess patient support systems in preparation for surgery.

All patients were required to attend a pre-surgery educational session ~2-wks prior to surgery to learn about perioperative risk-mitigation techniques, diet progression, nutritional supplementation, day of surgery event progression, pain management, hydration, mobility, ambulation, gastrointestinal symptom management, post-surgery course, symptoms, signs of complications, and instructions for contacting the surgery team for questions and concerns. Support persons were encouraged to accompany the patients during these visits. The facility preoperative clinic completed the anesthesia screening, where instructions were provided to patients on perioperative management of antihypertensives, diabetic medications, anticoagulants, glucagon-like peptide-1 (GLP-1) receptor agonists, and discontinuation of medication and supplements that could increase bleeding risk, such as vitamin E and fish oils.

*Perioperative & intraoperative process*

Perioperative care on the day of surgery commenced with a nurse assessment, large-bore IV placement, anesthesiologist assessment, and pre-emptive abdominal plane nerve block, which was an erector spinae block under ultrasound guidance with 25 to 30 mL 0.25% Marcaine with epinephrine on either side (just surgically directed transverse abdominal plane [TAP] block prior to Nov 2019). This was complemented with an additional 40 to 50 mL by rectus sheath and transverse abdominal plane block administered under laparoscopic guidance at the end of the surgery. Unless otherwise contraindicated, all patients received enoxaparin 40 mg subcutaneously preoperatively ~2 hours prior to the planned incision time, cefazolin 2 g (3 g in patients weighing >120 kg), metronidazole 500 mg, magnesium sulfate 4 g, and iron sucrose 250 mg if they were iron deficient. Levaquin 500 mg was administered to patients with a history of anaphylaxis to cephalosporins. Fluconazole 400 mg was also administered to patients undergoing gastric revision. A Foley catheter was inserted in all surgeries planned to exceed 4 hours. Approximately 1 L of crystalloids was administered prior to propofol-induced general endotracheal anesthesia, which was continued at a rate of ~ 1 L/h or as dictated by patient needs and tissue perfusion assessment. Rocuronium was used for muscle relaxation and sugammadex was used for reversal (neostigmine prior to Nov 2018).

*Surgical technique*

Peritoneal access was obtained with the patient in the supine position by using a long Veress needle in the left subcostal area. Peritoneum was entered under direct vision using a standard-length 8 mm robotic trocar in the left paramedian area, and additional standard robotic trocars were placed in the upper abdomen along with a 15 cm 15 mm right lower paramedian and a 15 cm 12 mm trocar in the left lower abdomen as assist ports along with a 5 mm right midaxillary trocar for the flexible liver retractor, which was secured using a Martin arm following which the Xi robot (Si robot prior to Nov 2017) was docked for upper abdominal surgery from the patient’s left side.

EndoGIA staples using Tri-Staple technology (Covidien/Medtronic) and a powered handle (Signia) buttressed with Veritas absorbable staple-reinforcing material was used with all black and purple loads. Robotic staplers were not consistently available at our institution until ~2021, we therefore used the same powered hand-held endomechanical device to reduce potential outcome differences related to staplers. Gastro- and duodenoenterostomies, as well as gastro-gastrostomies, were performed using 3/0 absorbable 15 cm V-loc 90 sutures (Vicryl sutures prior to Dec 2020) in two layers and pneumatically tested using a 36 French orogastric tube (intraoperative UGI endoscopy prior to November 2021). Enteroenterostomies were performed in a side-to-side, functional-end-to-side fashion using a 60 mm tan load to create them and a buttressed 60 mm purple load to close them. Human fibrin sealant (Tissel, Baxter) was applied intraluminally to minimize the risk of bleeding (after July 2022). Mesenteric defects were closed using running 3/0 non-absorbable 15 cm V-loc sutures (Ethibond sutures prior to Dec 2020). The fascia was closed at the 15 mm and 12 mm trocar sites using 0 Vicryl sutures with a non-disposable fascial closure device (Carter Thomasson).

Vertical sleeve gastrectomy (VSG) was performed using a non-disposable 34 French blunt-tipped bougie (Pilling) with a 60 mm black and purple load starting ~4 cm from the pylorus, ~1.5 cm from the incisura, and 1 cm from the gastroesophageal (GE) junction. Forty French were used in men undergoing duodenal switch (DS) and single-anastomosis duodenal ileal (SADI) bypass. Revision vertical partial gastrectomy was fashioned to resemble this, as dictated by the orientation of the previous staple lines, sometimes necessitating removal of the dilated remnants in two different portions, sparing the incisura area, especially if the staple line was not parallel to the lesser curvature or twisted.

The alimentary limb lengths were 225–400 cm, with 100–300 cm common channel lengths and 100–150 cm Roux limb with an antecolic duodeno-enterostomy. Proximal Roux-en-Y gastric bypass was performed using a 45 cm purple load at right angles to the lesser curve and at least two 60 mm purple loads to complete the gastric transection through the angle of His at least 1 cm from the GE junction to create a vertically oriented 5 cm lesser curvature pouch. A retrocolic antegastric gastroenterostomy was then performed, with a 100 cm Roux limb using a supra-mesocolic approach to locate the suspensory muscle of Trietz and measure a 150 cm biliopancreatic limb.

Cholecystectomies were performed in all patients with DS and SADI and in all bariatric patients (only in those with gallstones or other symptomatic gallbladder diseases prior to August 2017). Hiatal herniorrhaphies were performed using circumferential hiatal and distal esophageal mobilization to ensure an adequate intra-abdominal esophageal length of 2–3 cm without any traction on the stomach remnant. Posterior crural approximation was completed using interrupted horizontal mattress 0 Ethibond sutures with at least 34 French bougie to minimize the risk of postprandial dysphagia. Ligamentum teres cardiopexy was used to reinforce and secure the GE junction in an intra-abdominal location (after July 2019). Extensive capsulectomy was necessary for revision and conversion of adjustable gastric bands.

*Postoperative process*

Standard oral and IV narcotics were used in the immediate postoperative phase, complemented with ketorolac 60 mg IM and modafinil 300 mg. Nausea was managed with intravenous and sublingual ondansetron (8 mg), metoclopramide (10 mg), droperidol (0.625 mg), and promethazine (25 mg). A comprehensive metabolic panel, complete blood count, and magnesium and phosphorus levels were obtained, and potassium, magnesium, and phosphorus levels were replaced if below 4.0, 2.0, and 3.5 mg/dL, respectively. Bilateral lower-extremity venous duplex was performed after surgery for over 4 h. All patients underwent a CT scan of the abdomen and pelvis with 360 mL of oral and IV contrast, with the last 90 mL administered immediately prior to the study.

All patients were contacted by the office staff the morning after discharge and again 2–3 days postoperatively. Patients were routinely seen ~2wks post-operatively. Patients living >3 hours away were requested to stay in the area for at least 2–5 days and were typically seen in the office prior to departure.

Upper gastrointestinal swallow test was performed on the day of surgery, the next day, or 1–3 days after discharge.
