# Supplementary material for: Same-Day Discharge Versus Extended-Stay Robotic Metabolic Bariatric Surgery Including Duodenal Switch and Conversions, Prospective 10-year Safety Study
Source: Research Square preprint supplement (doi:10.21203/rs.3.rs-8526516/v1), 2026-02-10
Supplement: Supplementary file 6 [file e36f2ba6b41f885712d8f18c.docx]

**Supplemental Tables 2 and 3**

**Supplemental Table 2. Same-Day Discharge, Extended Stay, and Overall Cases by Revision Type**

| **Initial Procedure (From)** | **Revision/Conversion (To)** | **SDD Case Count** | **ES Case Count** | **Total Case Count** |
| --- | --- | --- | --- | --- |
| VSG | R-VSG, DS | 20 | 12 | **32** |
| AGB | VSG | 20 | 9 | **29** |
| AGB | DS | 13 | 15 | **28** |
| AGB | SADI | 12 | 7 | **19** |
| VSG | DS | 13 | 1 | **14** |
| VSG | PGBP | 3 | 6 | **9** |
| SADI | DS | 6 | 1 | **7** |
| AGB | PGBP | 5 | 1 | **6** |
| PGBP | DS | 3 | 3 | **6** |
| PGBP | MGBP-JI, P-AGB | 1 | 3 | **4** |
| VSG | R-VSG, SADI | 1 | 2 | **3** |
| PGBP | MGBP-JI, N-GE | 1 | 2 | **3** |
| PGBP | MGBP-JI | 2 | 1 | **3** |
| ARS | VSG | 2 | 1 | **3** |
| VSG | R-VSG | 2 | 0 | **2** |
| R-VSG | R-VPGT, DS | 1 | 1 | **2** |
| PGBP | SADI | 0 | 2 | **2** |
| OMGBP | P-AGB | 1 | 1 | **2** |
| ARS | DS | 2 | 0 | **2** |
| DS | EE, P-AGB | 0 | 2 | **2** |
| VSG | R-VSG, DS, P-AGB | 1 | 1 | **2** |
| eAGB | PG | 1 | 1 | **2** |
| VSG | SADI | 2 | 0 | **2** |
| R-MGBP-JI | P-AGB | 1 | 0 | **1** |
| AGB, DS | Port | 1 | 0 | **1** |
| R-VSG | DS | 0 | 1 | **1** |
| OPGBP-NT | SADI | 0 | 1 | **1** |
| OPGBP-NT | MGBP, R-GE, NTG | 0 | 1 | **1** |
| OVBG | MGBP-JI, NTG | 0 | 1 | **1** |
| R-PGBP | P-AGB | 1 | 0 | **1** |
| R-DS | R-VSG | 0 | 1 | **1** |
| R-VSG | SADI | 1 | 0 | **1** |
| AGB Rem | SADI | 0 | 1 | **1** |
| OPGBP | MGBP-JI, STG | 0 | 1 | **1** |
| OGP, AGB Rem | R-VSG | 1 | 0 | **1** |
| R-DS | MGBP-JI, R-GE, NTG | 0 | 1 | **1** |
| DS | R-VSG, EE | 1 | 0 | **1** |
| R-OAGBP | MGBP, R-GE | 1 | 0 | **1** |
| PGBP | MGBP-JI, N-GE, P-AGB | 0 | 1 | **1** |
| R-SADI | R-VPGT, DS, P-AGB | 1 | 0 | **1** |
| DS | EE, IH | 1 | 0 | **1** |
| OPGBP | MGBP, R-GE, STG | 0 | 1 | **1** |
| OMGBP | EE | 1 | 0 | **1** |
| AGB Rem | VSG | 0 | 1 | **1** |
| PGBP | MGBP-JI, Port | 0 | 1 | **1** |
| OPGBP | MGBP-JI, P-AGB | 0 | 1 | **1** |
| PGBP | R-GE, PG, MGBP-JI | 0 | 1 | **1** |
| ARS | PGBP | 0 | 1 | **1** |
| ODS | R-VSG | 0 | 1 | **1** |
| OPGBP-NT | MGBP, R-GE, STG | 0 | 1 | **1** |
| PS | PGBP | 1 | 0 | **1** |
| PGBP | MGBP-JI, STG | 1 | 0 | **1** |
| eAGB | VSG | 1 | 0 | **1** |
| PGBP | PR, R-GE, NTG | 0 | 1 | **1** |
| PGBP | DS, IH | 0 | 1 | **1** |
| **Total Case Count** | | **125** | **91** | **216** |

**Supplemental Table 3. Glossary for Supplemental Table 2**

| **Term/Abbreviation** | **Definition** |
| --- | --- |
| AGB | Adjustable Gastric Band |
| AGB Rem | AGB Removal |
| ARS | Anti-Reflux Surgery |
| DS | Duodenal Switch (dual anastomosis) |
| eAGB | Eroded AGB |
| EE | Enterectomy with Entero-enterostomy |
| IH | Internal Hernia Reduction & Repair |
| MGBP | Malabsorptive Roux-en-Y Gastric Bypass |
| MGBP-JI | MGBP with Jejunal Interposition |
| N-GE | Narrowing Gastro-enterostomy |
| NTG | Near-total Gastrectomy |
| ODS | Open DS |
| OGP | Open Repair of Gastric Perforation |
| OMGBP | Open MGBP |
| OPGBP | Open PGBP |
| OPGBP-NT | Open PGBP non-transected |
| OVBG | Open Vertical Banded Gastroplasty |
| P-AGB | AGB around the Pouch or Sleeve |
| PG | Partial Gastrectomy |
| PGBP | Proximal Roux-en-Y Gastric Bypass |
| Port | AGB Port Replacement |
| PR | Pouch Reduction |
| PS | Pyloric Stenosis |
| R-DS | Revision DS |
| R-GE | Re-do Gastro-enterostomy |
| R-MGBP-JI | Revision MGBP-JI |
| R-OAGBP | Revision One-anastomosis Gastric Bypass |
| R-PGBP | Revision PGBP |
| R-SADI | Revision SADI |
| R-VPGT | Revision Vertical Partial Gastrectomy (revision of R-VSG) |
| R-VSG | Revision VSG |
| SADI | Single Anastomosis Duodenal Ileal Bypass |
| STG | Subtotal Gastrectomy |
| VSG | Vertical Sleeve Gastrectomy |
