# Supplementary material for: Same-Day Discharge Versus Extended-Stay Robotic Metabolic Bariatric Surgery Including Duodenal Switch and Conversions, Prospective 10-year Safety Study
Source: Research Square preprint supplement (doi:10.21203/rs.3.rs-8526516/v1), 2026-02-10
Supplement: Supplementary file 7 [file f1ef683188bc5c98235d1612.docx]

**Supplemental Figures 1 and 2**

**Supplemental Figure 1. Same-Day Discharge and Extended-Stay Surgeries Performed by Year**

**
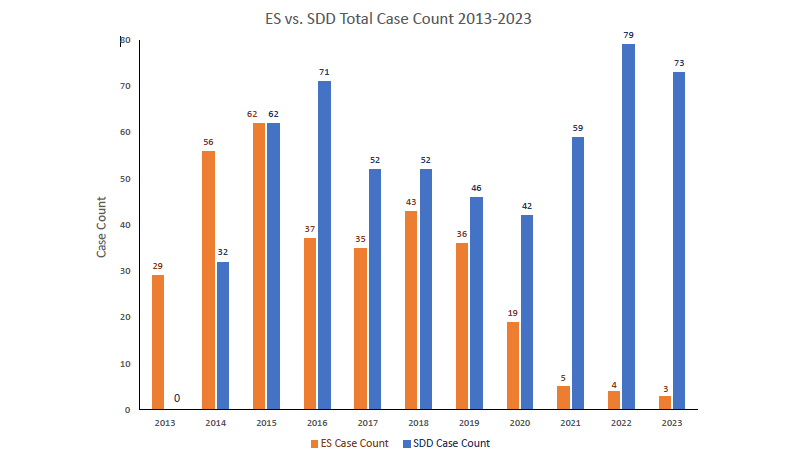
**

**Supplemental Figure 2. Same-Day Discharge and Extended-Stay Surgeries by Surgery Type***
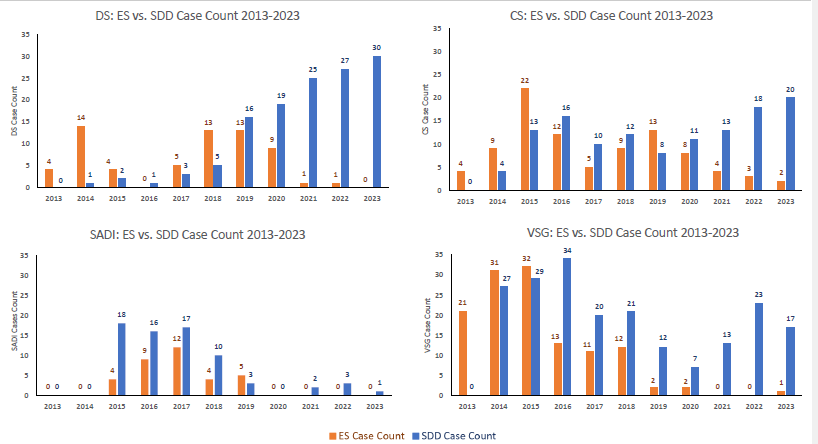


* PGBP and Others not shown due to small sample size.
