# Supplementary material for: Same-Day Discharge Versus Extended-Stay Robotic Metabolic Bariatric Surgery Including Duodenal Switch and Conversions, Prospective 10-year Safety Study
Source: Research Square preprint supplement (doi:10.21203/rs.3.rs-8526516/v1), 2026-02-10
Supplement: Supplementary file 8 [file f5f963c21e515d9f633d5d49.docx]

**Supplemental Table 1**

**Supplemental Table 1. Cases by Surgery Type and Year. (A) Same-Day Discharge Cases (B) Extended Stay Cases. (C) Overall Cases.**

1. **Same Day Discharge Cases:**

| **Case Type** | **2014** | | **2015** | | **2016** | | **2017** | | **2018** | | **2019** | | **2020** | | **2021** | | **2022** | | **2023** | | **Total Case Count** | **% of Total Cases** |
| --- | --- | --- | --- | --- | --- | --- | --- | --- | --- | --- | --- | --- | --- | --- | --- | --- | --- | --- | --- | --- | --- | --- |
| **Case Count** | **% of Cases** | **Case Count** | **% of Cases** | **Case Count** | **% of Cases** | **Case Count** | **% of Cases** | **Case Count** | **% of Cases** | **Case Count** | **% of Cases** | **Case Count** | **% of Cases** | **Case Count** | **% of Cases** | **Case Count** | **% of Cases** | **Case Count** | **% of Cases** |
| VSG | 27 | 84.4 | 29 | 46.8 | 34 | 47.9 | 20 | 38.5 | 21 | 40.4 | 12 | 26.1 | 7 | 16.7 | 13 | 22.0 | 23 | 29.1 | 17 | 23.3 | 203 | 35.7 |
| CS | 4 | 12.5 | 13 | 21.0 | 16 | 22.5 | 10 | 19.2 | 12 | 23.1 | 8 | 17.4 | 11 | 26.2 | 13 | 22.0 | 18 | 22.8 | 20 | 27.4 | 125 | 22.0 |
| DS | 1 | 3.1 | 2 | 3.2 | 1 | 1.4 | 3 | 5.8 | 5 | 9.6 | 16 | 34.8 | 19 | 45.2 | 25 | 42.4 | 27 | 34.2 | 30 | 41.1 | 129 | 22.7 |
| SADI | 0 | 0.0 | 18 | 29.0 | 16 | 22.5 | 17 | 32.7 | 10 | 19.2 | 3 | 6.5 | 0 | 0.0 | 2 | 3.4 | 3 | 3.8 | 1 | 1.4 | 70 | 12.3 |
| PGBP | 0 | 0.0 | 0 | 0.0 | 0 | 0.0 | 0 | 0.0 | 2 | 3.8 | 0 | 0.0 | 5 | 11.9 | 6 | 10.2 | 8 | 10.1 | 5 | 6.8 | 26 | 4.6 |
| Other | 0 | 0.0 | 0 | 0.0 | 4 | 5.6 | 2 | 3.8 | 2 | 3.8 | 7 | 15.2 | 0 | 0.0 | 0 | 0.0 | 0 | 0.0 | 0 | 0.0 | 15 | 2.6 |
| **Total** | **32** | **100.0** | **62** | **100.0** | **71** | **100.0** | **52** | **100.0** | **52** | **100.0** | **46** | **100.0** | **42** | **100.0** | **59** | **100.0** | **79** | **100.0** | **73** | **100.0** | **568** | **100.0** |

1. **Extended Stay Cases:**

| **Case Type** | **2013** | | **2014** | | **2015** | | **2016** | | **2017** | | **2018** | | **2019** | | **2020** | | **2021** | | **2022** | | **2023** | | **Total Case Count** | **% of Total Cases** |
| --- | --- | --- | --- | --- | --- | --- | --- | --- | --- | --- | --- | --- | --- | --- | --- | --- | --- | --- | --- | --- | --- | --- | --- | --- |
| **Case Count** | **% of Cases** | **Case Count** | **% of Cases** | **Case Count** | **% of Cases** | **Case Count** | **% of Cases** | **Case Count** | **% of Cases** | **Case Count** | **% of Cases** | **Case Count** | **% of Cases** | **Case Count** | **% of Cases** | **Case Count** | **% of Cases** | **Case Count** | **% of Cases** | **Case Count** | **% of Cases** |
| VSG | 21 | 72.4 | 31 | 55.4 | 32 | 51.6 | 13 | 35.1 | 11 | 31.4 | 12 | 27.9 | 2 | 5.6 | 2 | 10.5 | 0 | 0.0 | 0 | 0.0 | 1 | 33.3 | **125** | 38.0 |
| CS | 4 | 13.8 | 9 | 16.1 | 22 | 35.5 | 12 | 32.4 | 5 | 14.3 | 9 | 20.9 | 13 | 36.1 | 8 | 42.1 | 4 | 80.0 | 3 | 75.0 | 2 | 66.7 | **91** | 27.7 |
| DS | 4 | 13.8 | 14 | 25.0 | 4 | 6.5 | 0 | 0.0 | 5 | 14.3 | 13 | 30.2 | 13 | 36.1 | 9 | 47.4 | 1 | 20.0 | 1 | 25.0 | 0 | 0.0 | **64** | 19.5 |
| SADI | 0 | 0.0 | 0 | 0.0 | 4 | 6.5 | 9 | 24.3 | 12 | 34.3 | 4 | 9.3 | 5 | 13.9 | 0 | 0.0 | 0 | 0.0 | 0 | 0.0 | 0 | 0.0 | **34** | 10.3 |
| PGBP | 0 | 0.0 | 1 | 1.8 | 0 | 0.0 | 0 | 0.0 | 0 | 0.0 | 4 | 9.3 | 2 | 5.6 | 0 | 0.0 | 0 | 0.0 | 0 | 0.0 | 0 | 0.0 | **7** | 2.1 |
| Other | 0 | 0.0 | 1 | 1.8 | 0 | 0.0 | 3 | 8.1 | 2 | 5.7 | 1 | 2.3 | 1 | 2.8 | 0 | 0.0 | 0 | 0.0 | 0 | 0.0 | 0 | 0.0 | **8** | 2.4 |
| **Total** | **29** | **100.0** | **56** | **100.0** | **62** | **100.0** | **37** | **100.0** | **35** | **100.0** | **43** | **100.0** | **36** | **100.0** | **19** | **100.0** | **5** | **100.0** | **4** | **100.0** | **3** | **100.0** | **329** | **100.0** |

1. **Overall Cases:**

| **Case Type** | **2013** | | **2014** | | **2015** | | **2016** | | **2017** | | **2018** | | **2019** | | **2020** | | **2021** | | **2022** | | **2023** | | **Total Case Count** | **% of Total Cases** |
| --- | --- | --- | --- | --- | --- | --- | --- | --- | --- | --- | --- | --- | --- | --- | --- | --- | --- | --- | --- | --- | --- | --- | --- | --- |
| **Case Count** | **% of Cases** | **Case Count** | **% of Cases** | **Case Count** | **% of Cases** | **Case Count** | **% of Cases** | **Case Count** | **% of Cases** | **Case Count** | **% of Cases** | **Case Count** | **% of Cases** | **Case Count** | **% of Cases** | **Case Count** | **% of Cases** | **Case Count** | **% of Cases** | **Case Count** | **% of Cases** |
| VSG | 21 | 72.4 | 58 | 65.9 | 61 | 49.2 | 47 | 43.5 | 31 | 35.6 | 33 | 34.7 | 14 | 17.1 | 9 | 14.8 | 13 | 20.3 | 23 | 27.7 | 18 | 23.7 | **328** | 36.6 |
| CS | 4 | 13.8 | 13 | 14.8 | 35 | 28.2 | 28 | 25.9 | 15 | 17.2 | 21 | 22.1 | 21 | 25.6 | 19 | 31.1 | 17 | 26.6 | 21 | 25.3 | 22 | 28.9 | **216** | 24.1 |
| DS | 4 | 13.8 | 15 | 17.0 | 6 | 4.8 | 1 | 0.9 | 8 | 9.2 | 18 | 18.9 | 29 | 35.4 | 28 | 45.9 | 26 | 40.6 | 28 | 33.7 | 30 | 39.5 | **193** | 21.5 |
| SADI | 0 | 0.0 | 0 | 0.0 | 22 | 17.7 | 25 | 23.1 | 29 | 33.3 | 14 | 14.7 | 8 | 9.8 | 0 | 0.0 | 2 | 3.1 | 3 | 3.6 | 1 | 1.3 | **104** | 11.6 |
| PGBP | 0 | 0.0 | 1 | 1.1 | 0 | 0.0 | 0 | 0.0 | 0 | 0.0 | 6 | 6.3 | 2 | 2.4 | 5 | 8.2 | 6 | 9.4 | 8 | 9.6 | 5 | 6.6 | **33** | 3.7 |
| Other | 0 | 0.0 | 1 | 1.1 | 0 | 0.0 | 7 | 6.5 | 4 | 4.6 | 3 | 3.2 | 8 | 9.8 | 0 | 0.0 | 0 | 0.0 | 0 | 0.0 | 0 | 0.0 | **23** | 2.6 |
| **Total** | **29** | **100.0** | **88** | **100.0** | **124** | **100.0** | **108** | **100.0** | **87** | **100.0** | **95** | **100.0** | **82** | **100.0** | **61** | **100.0** | **64** | **100.0** | **83** | **100.0** | **76** | **100.0** | **897** | **100.0** |
