# Supplementary material for: Same-Day Discharge Versus Extended-Stay Robotic Metabolic Bariatric Surgery Including Duodenal Switch and Conversions, Prospective 10-year Safety Study
Source: Research Square preprint supplement (doi:10.21203/rs.3.rs-8526516/v1), 2026-02-10
Supplement: Supplementary file 9 [file fa1e48aabf0e7eca07cfd341.docx]

**Supplemental Table 4**

**Supplemental Table 4. Reoperations and Serious Events Details. (A) Reoperations. (B) Serious Events**

| 1. **Reoperations:** | | |  |  |  | |  | | | |  |  |
| --- | --- | --- | --- | --- | --- | --- | --- | --- | --- | --- | --- | --- |
|  | **SDD vs ES** | **Original Surgery Type** | | **Reason for Reoperation*** | | **Days Post-op** | | **Days in Hospital**** | **Year** |
| 1 | SDD | CS - Eroded AGB to VSG | | SSI, leak at AGB extraction site, Lap Drainage, Gastrorrhaphy | | 2 | | 6 | 2015 |
| 2 | SDD | CS - s/p AGB to VSG, chole, recurrent hiatal hernia repair | | Hem intra abd - Lap Evacuation of RUQ intrabdominal hematoma | | 1 | | 1 | 2016 |
| 3 | SDD | CS - s/p VSG to PGBP | | SBO adh - tube decompression; 2 - SSI EE leak | | 7 | | N/A | 2018 |
| 4 | SDD | CS - S/p VSG to R-VSG, conversion to DS, chole | | Peritonitis, ileus vs SBO Diag Lap for ?etiology | | 2 | | 3 | 2023 |
| 5 | SDD | CS - s/p VSG to R-VSG, conversion to DS, PEH, LTC | | SSI leak, Diag Lap with lavage and drainage, Endoscopic internal, external drains | | 7 | | 23 | 2023 |
| 6 | SDD | DS - dual anastomosis Duodenal Switch | | Hem abd wall, IR Embolization and Open evacuation | | 1 | | 2 | 2023 |
| 7 | SDD | PGBP - Proximal Gastric Bypass | | SBO tube decomp; 2 - SBO adh, OEE | | 12 | | 10 | 2018 |
| 8 | SDD | PGBP - Proximal Gastric Bypass | | SBO, Lap decompression, mesenteric suture release | | 4 | | N/A | 2022 |
| 9 | SDD | SADI - Single Anastomosis Duodenal Ileal Bypass | | SSI bile leak, Lap enterorrhaphy, drainage | | 8 | | 6 | 2015 |
| 10 | SDD | SADI - Single Anastomosis Duodenal Ileal Bypass | | Fat necrosis s/p Lap enterectomy with entero-enterostomy, LOA | | 8 | | 1 | 2016 |
| 11 | SDD | VSG - Vertical Sleeve Gastrectomy | | Recurrent PEH, attempted repair, FJ | | 10 | | 1 | 2017 |
| 12 | ES | CS - s/p AGB removal to VSG | | SSI leak; prox stomach , Lap drainage 2 - Lap drainage | | 13 | | 4 | 2016 |
| 13 | ES | CS - s/p AGB to SADI, Chole | | Incar tro her, Lap Repair | | 10 | | N/A | 2015 |
| 14 | ES | CS - VSG to DS | | Incar tro her | | 4 | | 1 | 2016 |
| 15 | ES | CS - VSG to PGBP | | SBO tube decomp | | 8 | | 3 | 2015 |
| 16 | ES | PGBP - Proximal Gastric Bypass | | SBO adh | | 23 | | 2 | 2014 |
| 17 | ES | SADI - Single Anastomosis Duodenal Ileal Bypass | | Lap drainage of RUQ hematoma | | 4 | | 2 | 2017 |

*Comma=complications in the same reoperation; = reoperation vs reop_reason2

**Some reoperations/serious events did not require rehospitalization (marked as N/A)

1. **Serious Events (Excluding Reoperations):**

|  | **SDD vs ES** | **Original Surgery Type** | **SE Details** | **Days Post-op** | **Days in Hospital**** | **Year** |
| --- | --- | --- | --- | --- | --- | --- |
| 18 | SDD | DS - dual anastomosis Duodenal Switch | EGD dil , GI perf esoph, Stent placement | 27 | 5 | 2018 |
| 19 | SDD | Other - PEH repair | DVT RLE - gastrocnemius DVT | 13 | N/A | 2016 |
| 20 | SDD | VSG - Vertical Sleeve Gastrectomy | SSI leak (no op); esophageal stents | 13 | 15 | 2016 |
| 21 | SDD | VSG - Vertical Sleeve Gastrectomy | Portal v thrombosis - L | 10 | 0 | 2016 |
| 22 | SDD | VSG - Vertical Sleeve Gastrectomy | Portal v thrombosis | 18 | 2 | 2018 |
| 23 | ES | CS - s/p Prox GBP to DS | ED Obs, SSI, small contained leak near gastrogastomy | 12 | 3 | 2022 |

**Some reoperations/serious events did not require rehospitalization (marked as N/A)
